# Supplementary material for: Localization and RNA Binding of Mitochondrial Aminoacyl tRNA Synthetases
Source: PubMed Central journal article supplement (PMC7600831; doi:10.3390/genes11101185), 2020-10-12
Supplement: genes-11-01185-s001.pdf [file genes-11-01185-s001.pdf]

Consensus S. cerevisiae H. sapiens M. musculus D. rerio AlaRS

Consensus S. cerevisiae H. sapiens M. musculus D. rerio ArgRS

Consensus S. cerevisiae H. sapiens M. musculus D. rerio AsnRS

Consensus S. cerevisiae H. sapiens M. musculus D. rerio AspRS

Consensus S. cerevisiae H. sapiens M. musculus D. rerio CysRS

Consensus S. cerevisiae H. sapiens M. musculus D. rerio GluRS

Consensus S. cerevisiae H. sapiens M. musculus D. rerio GlyRS

Consensus S. cerevisiae H. sapiens M. musculus D. rerio HisRS

Consensus S. cerevisiae H. sapiens M. musculus D. rerio IleRS

Consensus S. cerevisiae H. sapiens M. musculus D. rerio LeuRS

Consensus S. cerevisiae H. sapiens M. musculus D. rerio LysRS

Consensus S. cerevisiae H. sapiens M. musculus D. rerio MetRS

Consensus S. cerevisiae H. sapiens M. musculus D. rerio PheRS

Consensus S. cerevisiae H. sapiens M. musculus D. rerio SerRS

Consensus S. cerevisiae H. sapiens M. musculus D. rerio ProRS

Consensus S. cerevisiae H. sapiens M. musculus D. rerio ThrRS

Consensus S. cerevisiae H. sapiens M. musculus D. rerio TrpRS

Consensus S. cerevisiae H. sapiens M. musculus D. rerio TyrRS

Consensus S. cerevisiae H. sapiens M. musculus D. rerio ValRS
